# Supplementary material for: Water-assisted ketonization of methyl palmitate to palmitone over metal incorporated TiO2 catalysts
Source: Royal Society of Chemistry journal article supplement (doi:10.1039/d4re00111g), 2024-01-01
Supplement: d4re00111g1.pdf [file d4re00111g1.pdf]

# Supporting Information

## Water-assisted ketonization of methyl palmitate to palmitone over metals incorporated TiO<sub>2</sub> catalysts

Jetsadagorn Pittayatornkul<sup>a</sup>, Tosapol Maluangnont<sup>\* b</sup>, Siriporn Jongpatiwut<sup>c</sup>, Piyasan Praserthdam<sup>d</sup>, Makoto Ogawa<sup>e</sup> and Tawan Sooknoi<sup>\*\* a,f</sup>,

<sup>a</sup> *Department of Chemistry, School of Science, King Mongkut's Institute of Technology Ladkrabang, Bangkok, 10520, Thailand*

<sup>b</sup> *College of Materials Innovation and Technology, King Mongkut's Institute of Technology Ladkrabang, Bangkok, 10520, Thailand*

<sup>c</sup> *The Petroleum and Petrochemical College, Chulalongkorn University, Bangkok 10330, Thailand*

<sup>d</sup> *Department of Chemical Engineering, Faculty of Engineering, Chulalongkorn University, Bangkok 10330, Thailand*

<sup>e</sup> *School of Energy Science and Engineering, Vidyasirimedhi Institute of Science and Technology, 555 Moo 1 Payupnai, Wangchan, Rayong 21210, Thailand*

<sup>f</sup> *Catalytic Chemistry Research Unit, School of Science, King Mongkut's Institute of Technology Ladkrabang, Bangkok, 10520, Thailand*

*Corresponding author email \* [tosapol.ma@kmitl.ac.th](mailto:tosapol.ma@kmitl.ac.th), \*\* [kstawan@gmail.com](mailto:kstawan@gmail.com)*

*Co-author email [64605025@kmitl.ac.th](mailto:64605025@kmitl.ac.th), [Siriporn.j@chula.ac.th](mailto:Siriporn.j@chula.ac.th), [Makoto.ogawa@vistec.ac.th](mailto:Makoto.ogawa@vistec.ac.th), [piyasan.p@chula.ac.th](mailto:piyasan.p@chula.ac.th)*

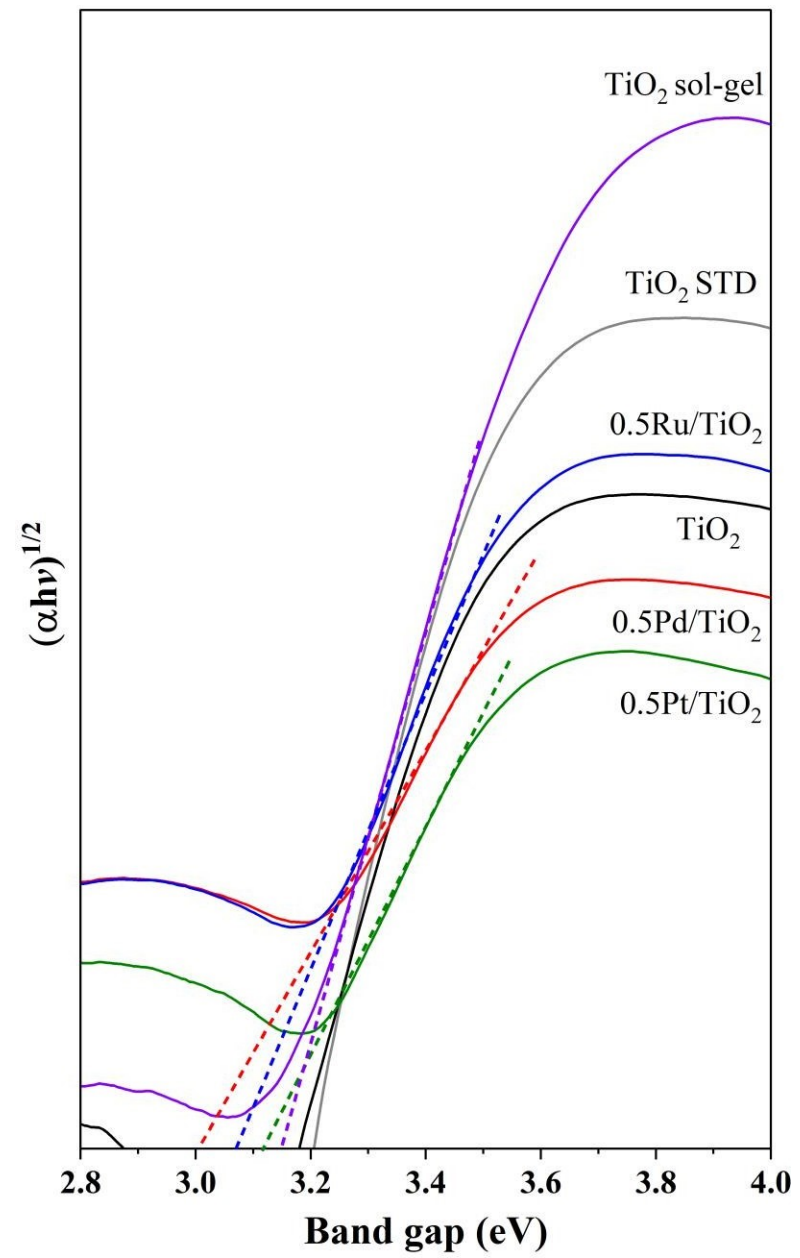

**Fig. S1.** Tauc plot of reduced catalysts

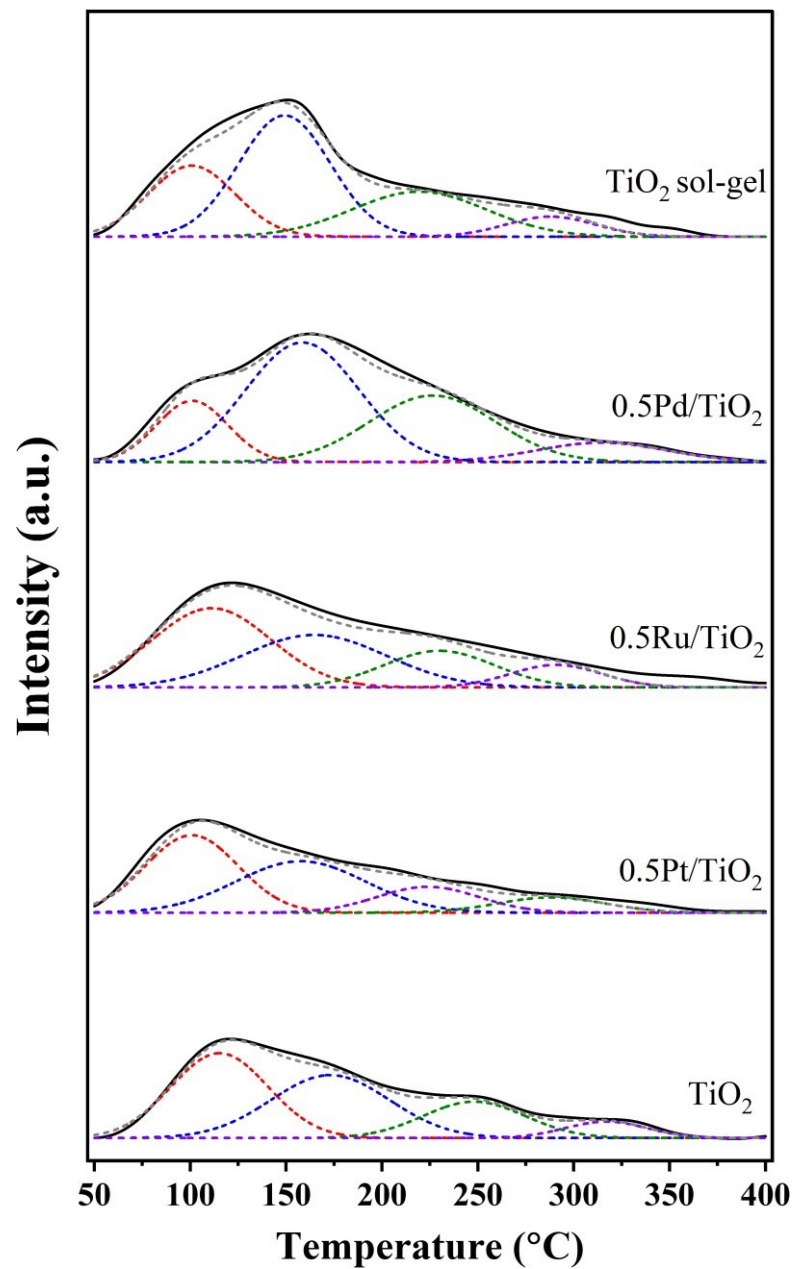

**Fig. S2.** NH<sub>3</sub>-TPD of reduced catalysts

| Entry | Catalyst                 | Acidity (μmol/g) |        |        |
|-------|--------------------------|------------------|--------|--------|
|       |                          | Weak             | Medium | Strong |
| 1     | TiO <sub>2</sub>         | 3.70             | 1.90   | 0.58   |
| 2     | 0.5Pt/TiO <sub>2</sub>   | 2.83             | 0.80   | 1.50   |
| 3     | 0.5Ru/TiO <sub>2</sub>   | 4.20             | 1.60   | 0.60   |
| 4     | 0.5Pd/TiO <sub>2</sub>   | 6.93             | 4.30   | 1.29   |
| 5     | TiO <sub>2</sub> sol-gel | 4.67             | 2.44   | 2.00   |

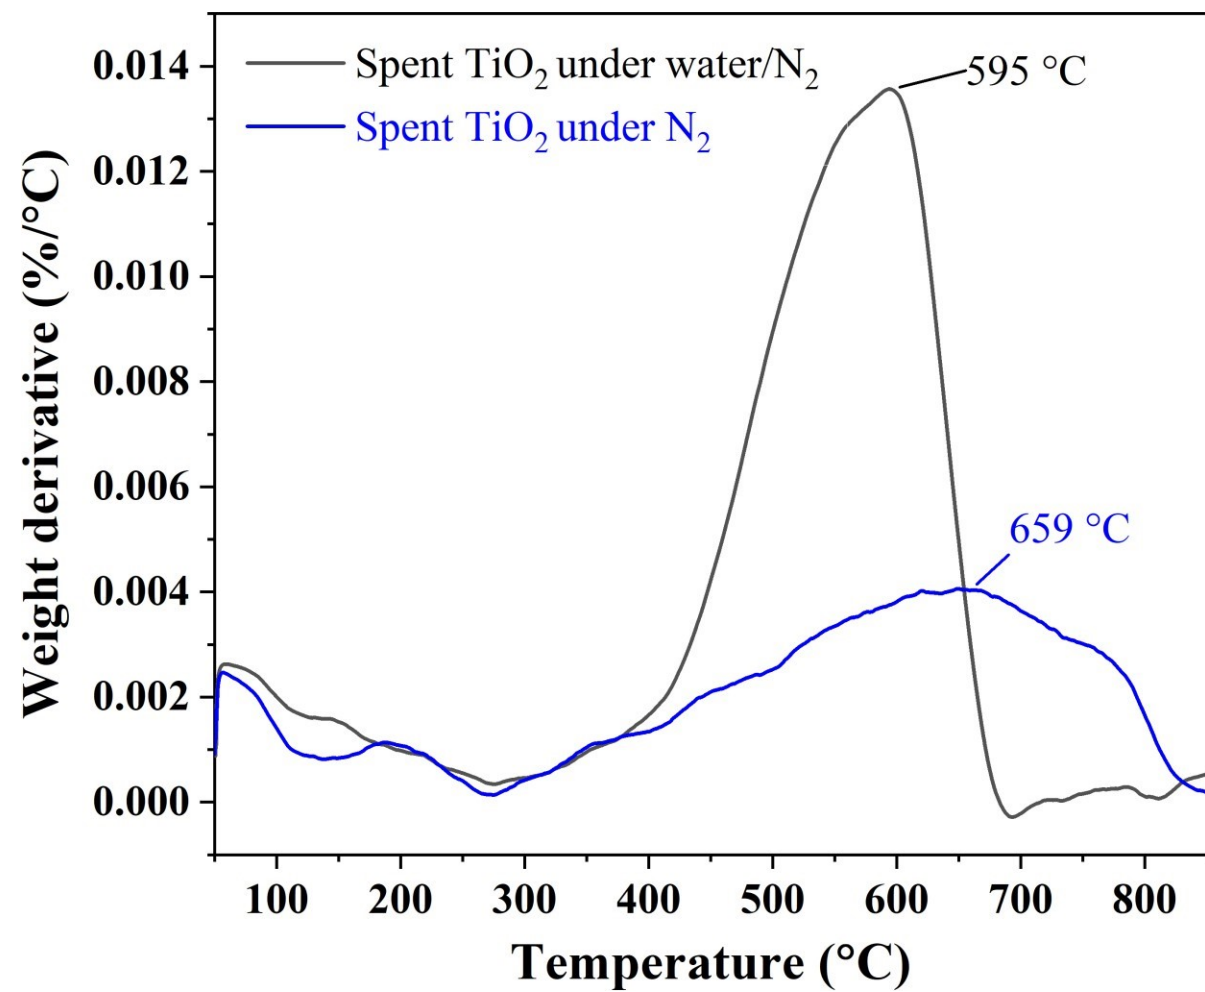

**Fig. S3.** TGA of spent TiO<sub>2</sub> from the reaction with/without water co-fed.

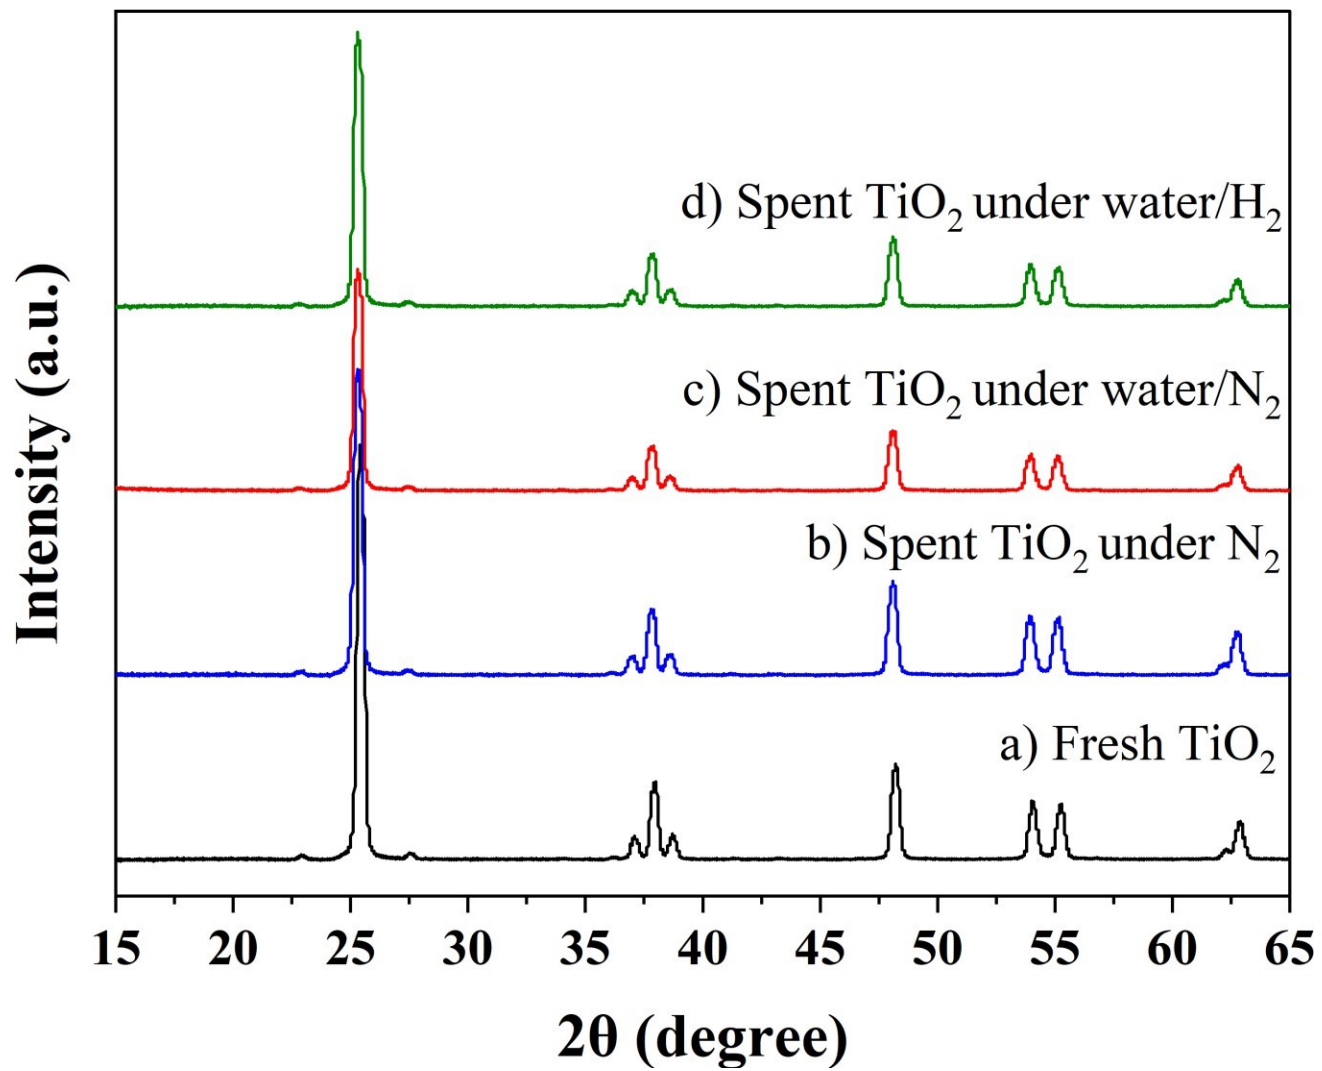

**Fig. S4.** XRD of the spent catalysts under various conditions

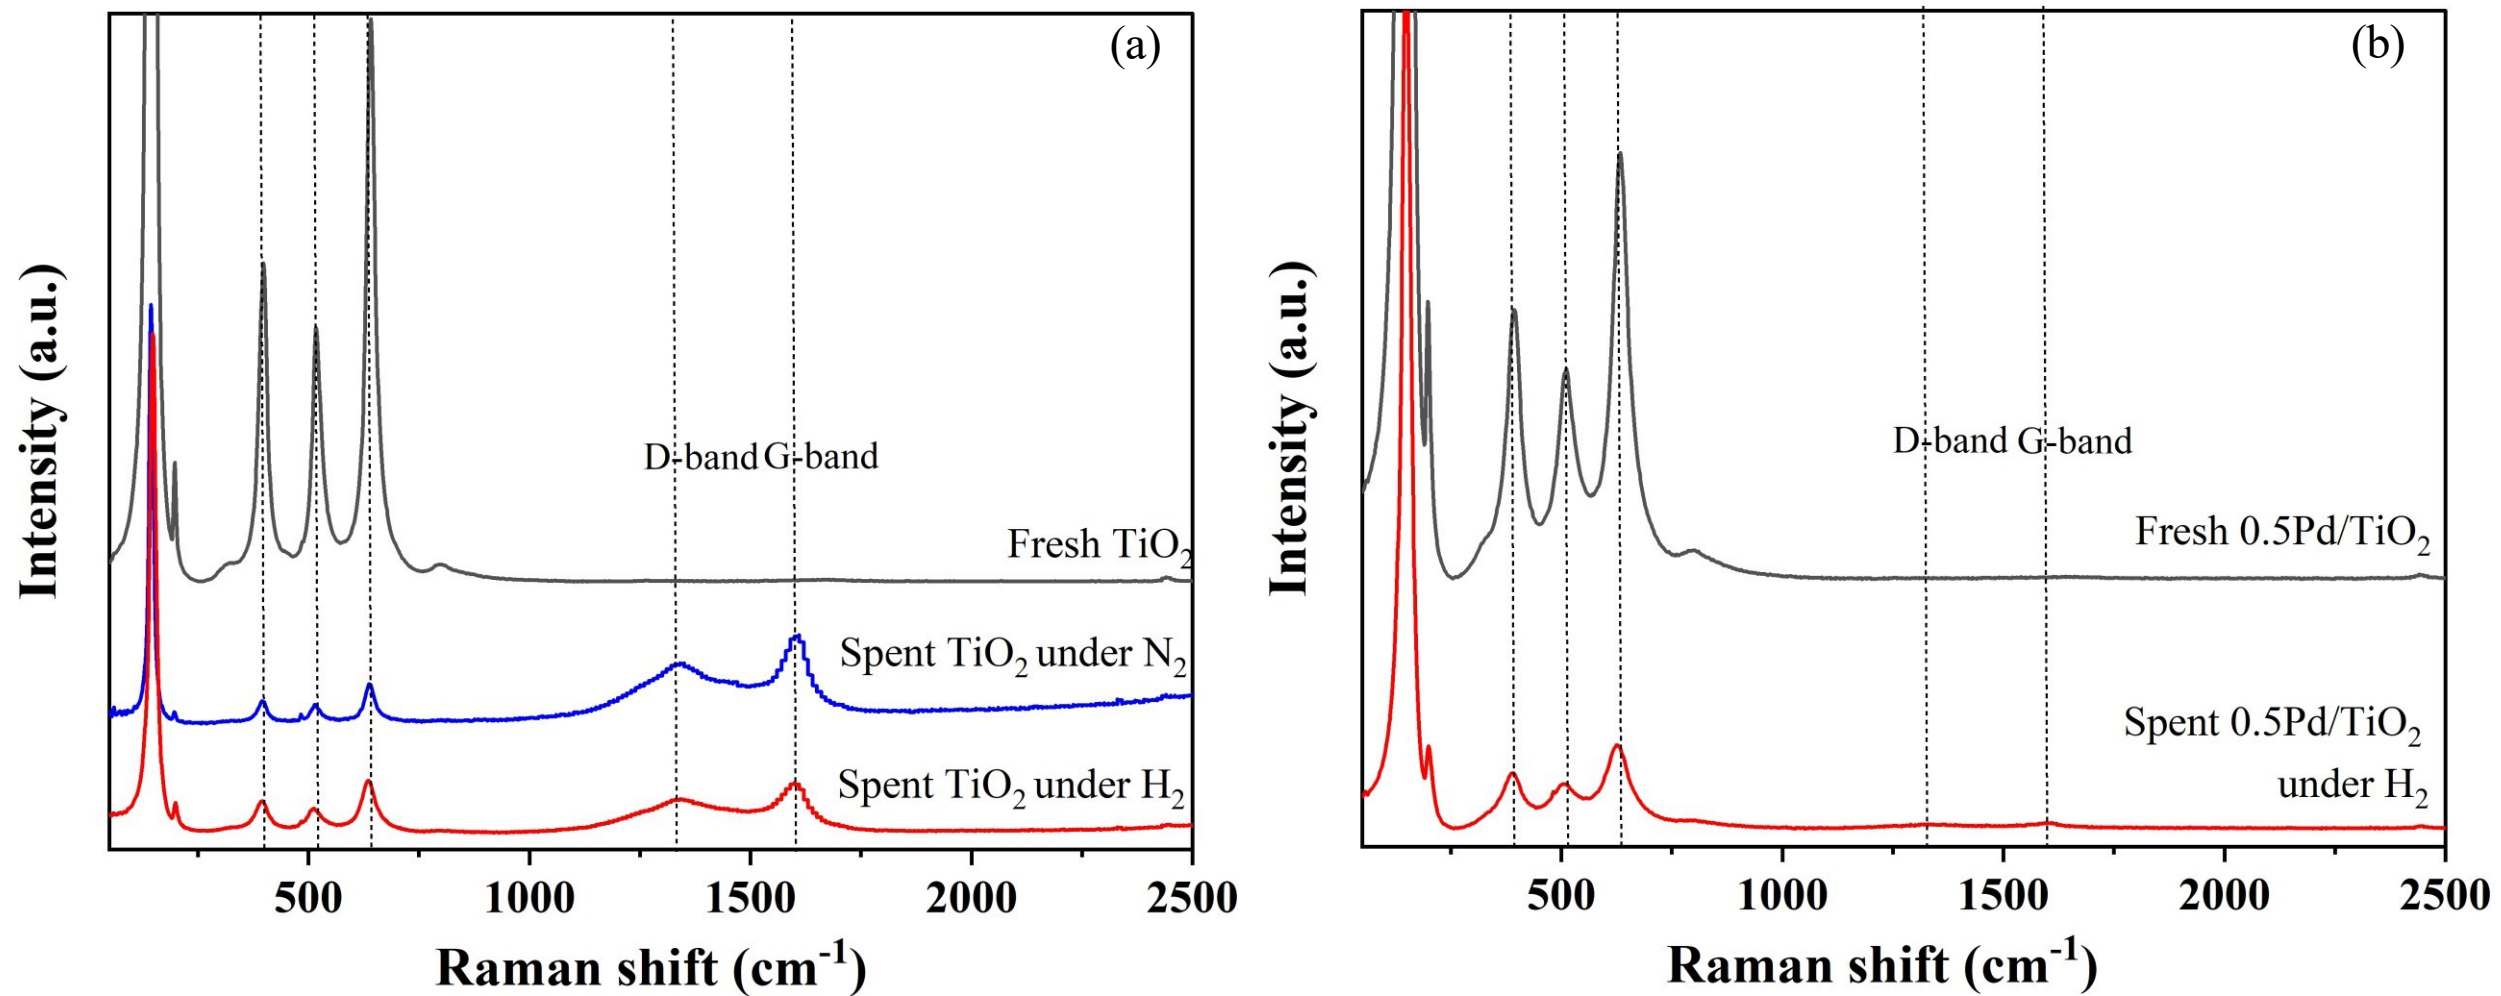

**Fig. S5.** Raman spectra of the fresh and spent TiO<sub>2</sub> (a) and 0.5Pd/TiO<sub>2</sub> (b).

**Table S1** Peak area and D/G band ratio from Raman spectra of the spent TiO<sub>2</sub> under H<sub>2</sub> and N<sub>2</sub> as carrier gas

| Entry | Catalyst                                    | Peak area |        | D/G  |
|-------|---------------------------------------------|-----------|--------|------|
|       |                                             | D-band    | G-band |      |
| 1     | Spent TiO <sub>2</sub> under N <sub>2</sub> | 148229    | 113545 | 1.3  |
| 2     | Spent TiO <sub>2</sub> under H <sub>2</sub> | 57735     | 76685  | 0.75 |

*Reaction condition 10%Methyl palmitate in dodecane : 3.1 ml/h, carrier gas flow rate : 50 ml/min, contact time : 581 gh/mol, activation temperature : 400 °C in air, reduction temperature : 400 °C under H<sub>2</sub>, reaction temperature : 400 °C, water : feed ratio 0.24*

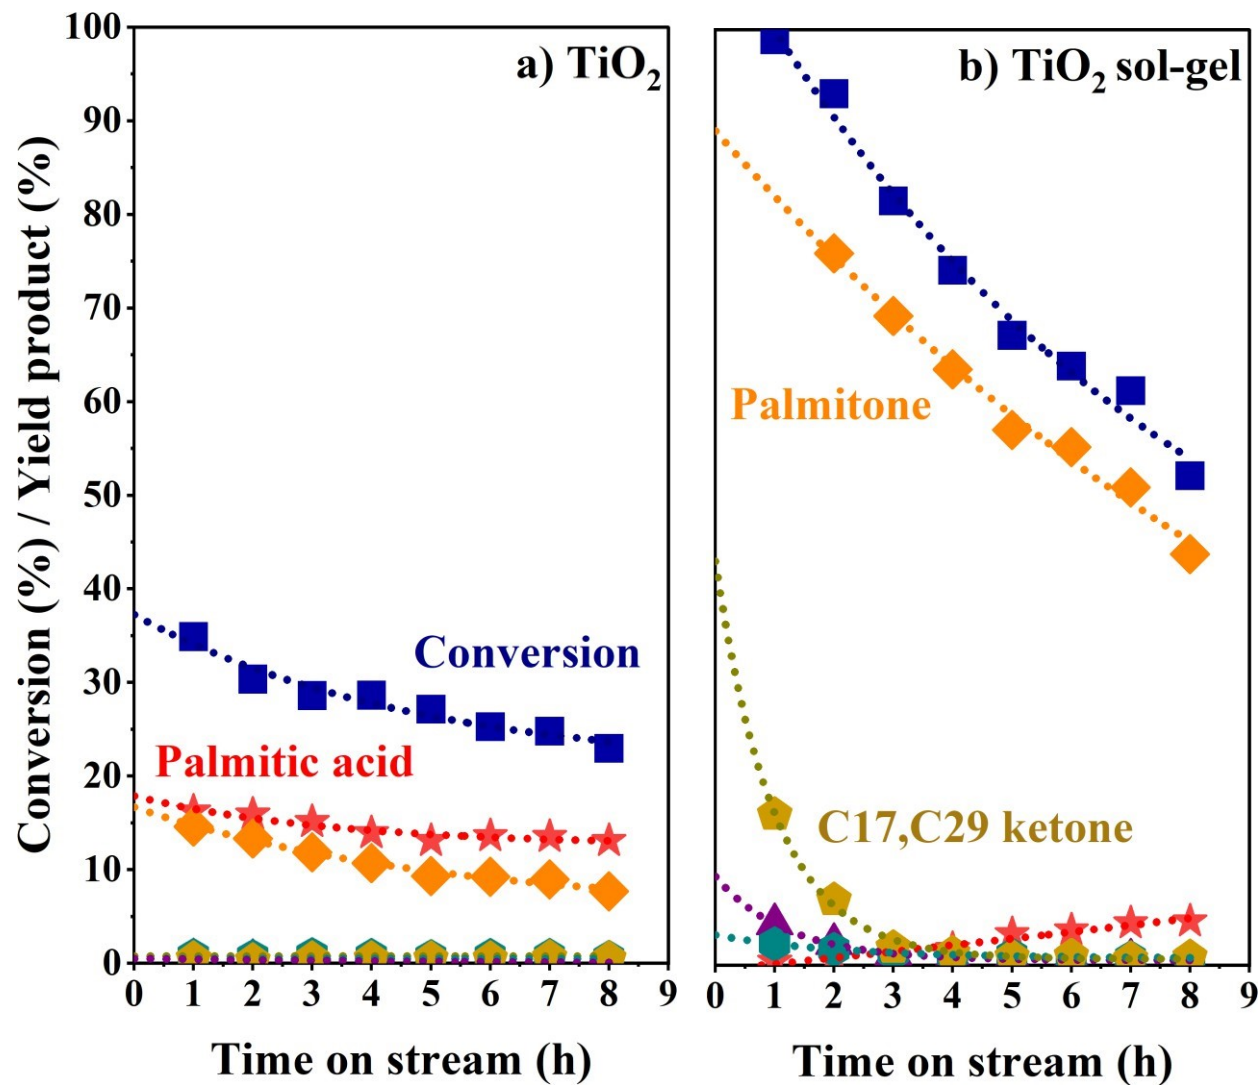

**Fig. S6.** Time on stream profiles for ketonization of methyl palmitate over TiO<sub>2</sub> and TiO<sub>2</sub> sol-gel

*Reaction condition 20% Methyl palmitate in dodecane : 3.1 ml/h, N<sub>2</sub> or H<sub>2</sub> flow rate : 50 ml/min, contact time : 58 gh/mol, activation temperature : 400 °C in air, reduction temperature : 400 °C under H<sub>2</sub>, reaction temperature : 400 °C, water : feed ratio 0.24*



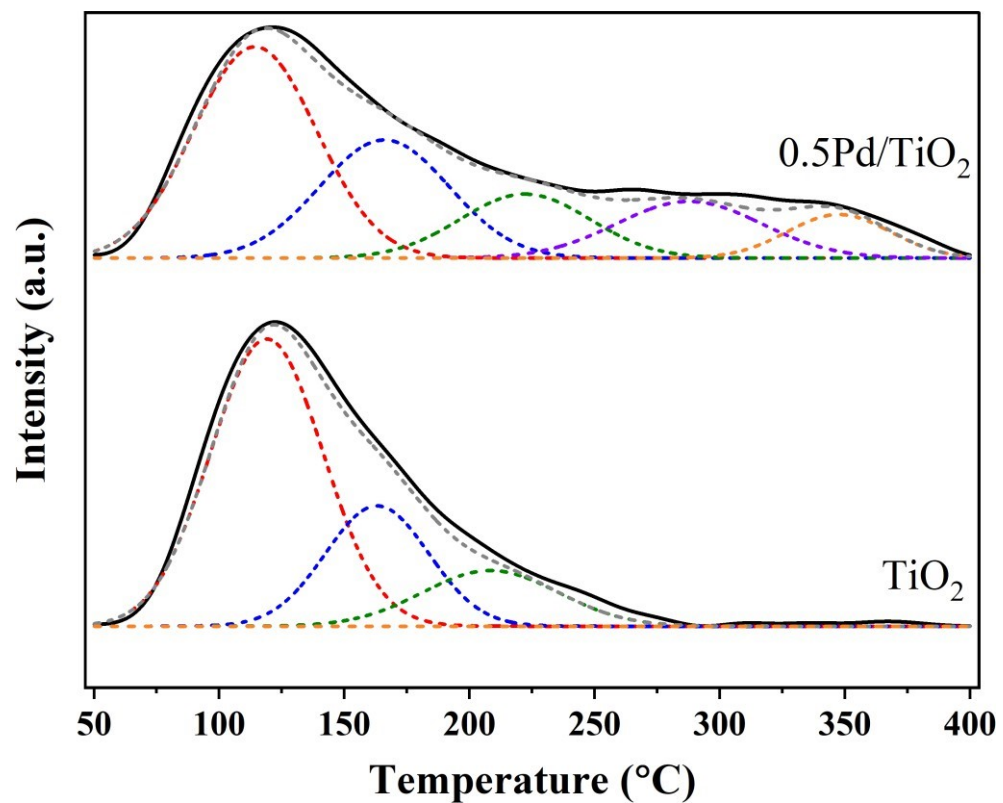

| Entry | Catalyst               | Basicity ( $\mu\text{mol/g}$ ) |                     |                  | Total |
|-------|------------------------|--------------------------------|---------------------|------------------|-------|
|       |                        | Weak (<120 °C)                 | Medium (120-200 °C) | Strong (>200 °C) |       |
| 1     | TiO <sub>2</sub>       | 2.92                           | 1.20                | 0.47             | 4.6   |
| 2     | 0.5Pd/TiO <sub>2</sub> | 2.39                           | 1.41                | 2.05             | 5.9   |

**Fig. S7.** CO<sub>2</sub>-TPD profiles and basicity of reduced 0.5Pd/TiO<sub>2</sub> and TiO<sub>2</sub> catalysts

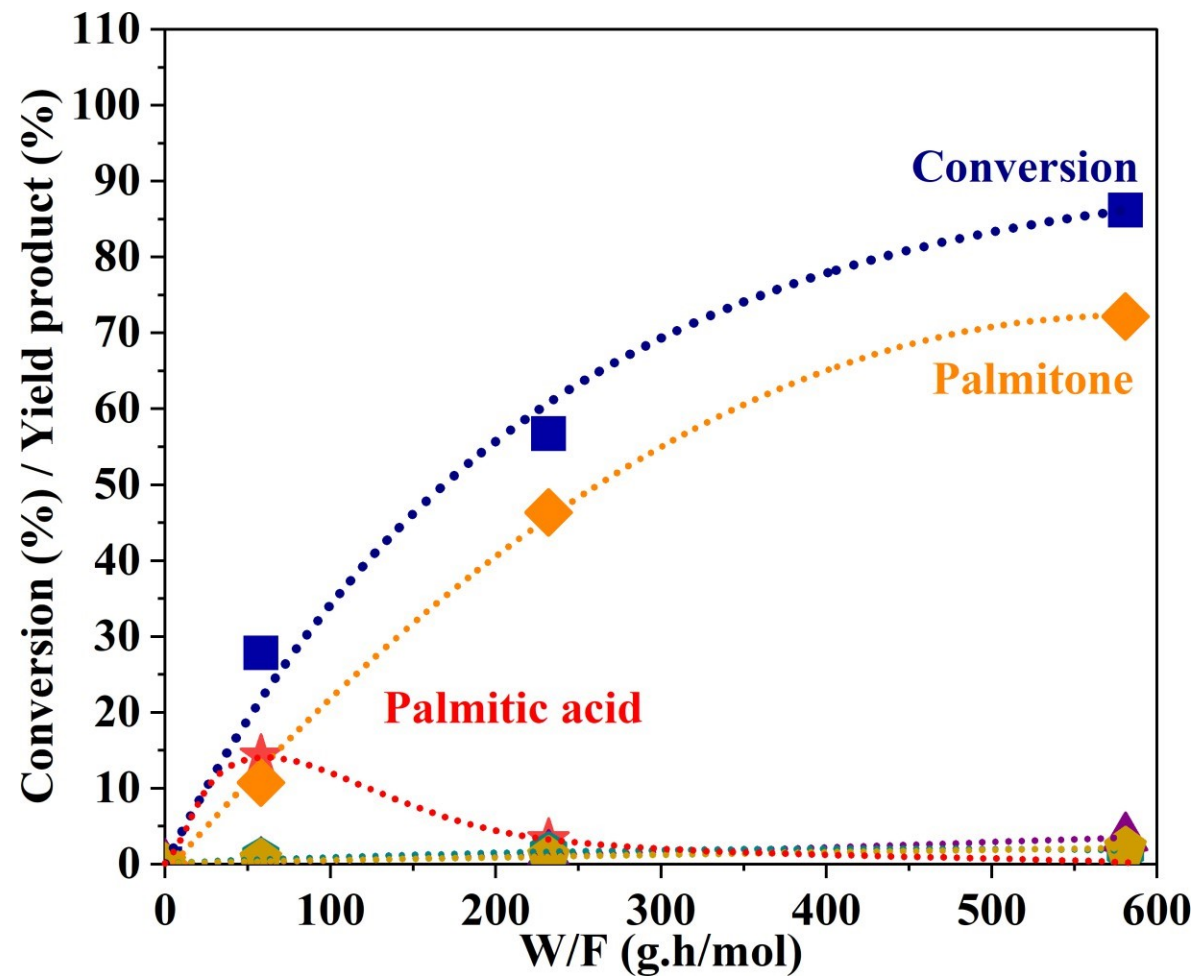

**Fig. S8.** Contact time profile for ketonization of methyl palmitate over  $\text{TiO}_2$  catalyst

*Reaction condition 10% Methyl palmitate in dodecane : 3.1 ml/h,  $\text{N}_2$  or  $\text{H}_2$  flow rate : 50 ml/min, contact time : 58-581 gh/mol, activation temperature : 400 °C in air, reduction temperature : 400 °C under  $\text{H}_2$ , reaction temperature : 400 °C, water : feed ratio 0.24*
